# Supplementary material for: Reemergence of Dengue Virus Serotype 3, Brazil, 2023
Source: PubMed Central journal article supplement (PMC10310385; doi:10.3201/eid2907.230595), 2023-07
Supplement: 23-0595-Techapp-s1.pdf [file 23-0595-Techapp-s1.pdf]

**Article DOI:** <https://doi.org/10.3201/eid2907.230595>

*EID cannot ensure accessibility for supplementary materials supplied by authors. Readers who have difficulty accessing supplementary content should contact the authors for assistance.*

# Reemergence of Dengue Virus Serotype 3, Brazil, 2023

## Appendix

### Materials and Methods

#### **Ethics statement, sample collection, and arboviral detection as a surveillance routine in Central State Laboratories**

In Roraima State and Paraná State most arboviral suspected cases are investigated for Zika, Dengue, and Chikungunya (ZDC) by the State's Central Laboratory (LACEN-RR in Roraima and LACEN-PR in Paraná) as a routine. Between 1st January and 27th March, 319 suspected acute arboviral samples were sent to the Roraima State Central Laboratory (LACEN-RR) for molecular diagnosis. At LACEN-RR, these samples underwent a nucleic acid extraction with commercial kits, followed by ZDC detection using the reverse transcription real-time PCR kit developed by Instituto de Biologia Molecular do Paraná (IBMP - Kit Biomol ZDC - <https://www.ibmp.org.br>), which not only detects DENV but also identifies its serotype. Only 10 cases were confirmed as dengue (DENV-2 = 4, DENV-3 = 4) or chikungunya (n = 2) by real-time reverse transcription PCR. Clinical and epidemiologic data, plus IgM detection, confirmed 19 other cases (DENV = 9, Chikungunya = 10). The socio-demographic and laboratory characteristics of the three DENV-3 cases are summarized in supplemental Table 1. The case from Paraná described in the present manuscript is considered as an imported case from Suriname since the patient arrived in Brazil with dengue symptoms 3 days before the sample collection. This study was approved by the Ethics Committee of Instituto Oswaldo Cruz, which waived signed informed consent (CAAE: 90249218.6.1001.5248). Access to the Brazilian genetic heritage was registered under the number SISGEN # A2E0307.

### **Epidemiologic data collection and visualization**

Epidemiologic data on dengue fever cases in Brazil were downloaded from the DATASUS database using the R package *microdatasus* (1). Specifically, data on the number of confirmed DENV cases and their corresponding serotypes were obtained. However, serotype information was only available from 2007 onwards. The data were extracted at the national level and stratified by year. Plots were produced using the *ggplot2* package on R software version 4.1.2.

### **Nucleotide sequencing library preparation**

As requested by local health authorities, DENV-3 positive serum samples were sent to Instituto Leônidas and Maria Deane (ILMD - Fiocruz Amazônia) for nucleotide sequencing and genomics characterization. At ILMD, samples were submitted to viral total nucleic acid extraction with a commercial kit (Promega Maxwell), according to the manufacturer's instructions. Thus, the total nucleic acid was used for the sequencing library with Illumina's Viral Surveillance Panel (VSP w ILMN RNA Prep w Enrich). The VSP manual (# 1000000124435 v03, April 2021) describes the preparation of viral genomic libraries through a hybrid capture method using biotinylated probes and enrichment for the complete genome sequencing of 66 human pathogens, including DENV-3, allowing the detection of mutations and new lineages, without bias.

### **Whole-genome sequencing and consensus genomes**

The VSP libraries were then submitted to nucleotide sequencing on a MiSeq instrument using V3 cartridges on  $2 \times 150$  cycles paired-end run (Illumina). The FastQ files generated at Illumina's cloud (<https://basespace.illumina.com>) were submitted to further quality check and duplicate removal steps using a customized workflow employing BBDuk (v38.84). The consensus genomes were assembled into contigs using BBMap and the GenBank DENV-3 reference genome (NC\_001475) as the template. We used the BBTools (BBDuk and BBMap v38.84 - <https://sourceforge.net/projects/bbmap/>) versions embedded in Geneious Prime 2023.0.4 software (<https://www.geneious.com>). Finally, all contigs were carefully visually inspected before further analysis. The obtained consensus genomes ranged in length from 10,511 to 10,697 nt, or 98.2 to 99.9% of the DENV-3 RefSeq, with no ambiguous or unidentified sites ("N").

### **DENV-3 genotype identification**

The DENV-3 consensus genomes obtained in this study were initially submitted to genotype identification using the Flavivirus Genotyping Tool Version 0.1 (<https://www.rivm.nl/mpf/typingtool/flavivirus/>). This analysis showed that the three genomes belong to the DENV-3 genotype III, with high bootstrap support (100.0).

### **DENV-3 dataset and global phylogenomics reconstruction**

We downloaded all DENV-3 genomes (genome length >10K) available on GenBank (2023-03-25) using the NCBI Virus portal (<https://www.ncbi.nlm.nih.gov/labs/virus/vssi/#/>). Subsequently, we confirmed both the serotype (DENV-3) and the genotype (GIII) using the same Flavivirus genotyping web tool previously mentioned, followed by removing sequences named as modified nucleic acids or linked to patents. Thus, this first dataset encompasses 986 DENV-3 (GIII) genomes available at GenBank, which were aligned with the four genomes obtained in this study using MAFFT v7.490 under the automatic selection of the appropriate strategy according to data size (2).

The aligned dataset was used to reconstruct phylogenomic relationships by maximum likelihood (ML) using IQ-TREE multicore version 2.0.3 (3). All sequences passed the IQ-TREE composition test, and ModelFinder (4) chose the GTR+F+R4 evolutionary model according to Bayesian Information Criterion. The tree branches' support was evaluated with Shimodaira–Hasegawa approximate likelihood-ratio test (SH-aLRT) (5) and Ultrafast bootstrap (UFBoot) (6), with 2,000 replicates.

### **Spatiotemporal and viral diffusion reconstruction of DENV-3**

To reconstruct the geographic and temporal origin of DENV-3 cases in Brazil in 2023, we employed a Bayesian phylogeographic inference approach implemented in BEAST v1.10.4 (7). To reduce computation time in the phylogeographic reconstructions, we selected the sub-set of most closely related Asian sequences to the newly generated DENV-3 genomes, as observed in the ML analysis. Moreover, we generate a “non-redundant” sub-set of 10 DENV-3 sequences representative of the viral diversity in imported cases from Cuba detected in Florida. To achieve this aim, sequences imported from Cuba were grouped by similarity (genetic similarity >0.985) with the CD-HIT program (8), and only one sequence per cluster (the oldest one) was selected. Finally, we exclude potential recombinant genomes detected by at least five out of seven

different algorithms (RDP, GENECONV, Chimaera, MaxChi, BootScan, SiScan, and 3seq) running in RDP5.34 (9) and temporal outlier sequences that deviated more than 1.5 interquartile ranges in the regression analysis of the root-to-tip divergence against the tip sampling time of the ML phylogenetic tree performed using TempEst v.1.5.3 (10). Time-scaled trees were inferred with a relaxed molecular clock model (11), outperforming the strict clock model in marginal likelihood estimation and a Bayesian Skyline coalescent model. The ancestral node states were reconstructed with a continuous-time Markov chain (CTMC) prior (12) and discrete spatial diffusion with an asymmetric substitution model to infer the migration events (13). Bayesian stochastic search variable selection (BSSVS) was performed to identify the significant migration routes. Two Markov Chain Monte Carlo (MCMC) chains were run for 100 million generations and combined after removing 10% burn-in. Convergence was assessed by calculating the Effective Sample Size (ESS) for all parameters using Tracer v1.7.1 (14). The time-scaled phylogeny was visualized using FigTree v1.4.4 (<http://tree.bio.ed.ac.uk/software/figtree>).

#### **Data availability**

The four new DENV-3 genomes obtained from samples collected in Brazil in 2023 are available in GenBank under accession numbers OQ706226-OQ706228 (Roraima State 2023) and OQ868517 (Paraná State, imported from Suriname). We also deposited another DENV-3 GIII genome obtained from a sample collected in Amazonas 2006 (OQ727062).

#### **Acknowledgments**

We acknowledge all data contributors, i.e., authors and their originating laboratories responsible for obtaining and submitting timely Dengue virus genomes, including metadata, via GenBank or other public databases. We appreciate the support of FIOCRUZ Genomics Surveillance Network members, as well as the Roraima State and Paraná State surveillance teams for the partnership in viral surveillance in Brazil. We would also like to thank Claudia Nunes Duarte dos Santos for critically reading the manuscript. Funding support: FAPEAM (Universal/AM call 2019; Rede Genômica de Vigilância em Saúde - REGESAM); Inova Fiocruz/Fundação Oswaldo Cruz (Inova Amazônia); Departamento de Ciência e Tecnologia (DECIT) of the Brazilian MoH; CNPq through their productivity research fellowships (306146/2017–7, 303902/2019–1 and 304883/2020-4, respectively); F.G.N., G.L.W., and G.B., respectively. FAPERJ (Grant number E-26/202.896/2018).

## References

1. Saldanha RF, Bastos RR, Barcellos C. Microdatasus: pacote para download e pré-processamento de microdados do Departamento de Informática do SUS (DATASUS). *Cad Saude Publica*. 2019;35:e00032419. [PubMed](#) <https://doi.org/10.1590/0102-311x00032419>
2. Katoh K, Standley DM. MAFFT multiple sequence alignment software version 7: improvements in performance and usability. *Mol Biol Evol*. 2013;30:772–80. [PubMed](#) <https://doi.org/10.1093/molbev/mst010>
3. Minh BQ, Schmidt HA, Chernomor O, Schrempf D, Woodhams MD, von Haeseler A, et al. IQ-TREE 2: new models and efficient methods for phylogenetic inference in the genomic era. *Mol Biol Evol*. 2020;37:1530–4. [PubMed](#) <https://doi.org/10.1093/molbev/msaa015>
4. Kalyaanamoorthy S, Minh BQ, Wong TKF, von Haeseler A, Jermini LS. ModelFinder: fast model selection for accurate phylogenetic estimates. *Nat Methods*. 2017;14:587–9. [PubMed](#) <https://doi.org/10.1038/nmeth.4285>
5. Shimodaira H, Hasegawa M. Multiple comparisons of log-likelihoods with applications to phylogenetic inference. *Mol Biol Evol*. 1999;16:1114–6. <https://doi.org/10.1093/oxfordjournals.molbev.a026201>
6. Hoang DT, Chernomor O, von Haeseler A, Minh BQ, Vinh LS. UFBoot2: improving the ultrafast bootstrap approximation. *Mol Biol Evol*. 2018;35:518–22. [PubMed](#) <https://doi.org/10.1093/molbev/msx281>
7. Suchard MA, Lemey P, Baele G, Ayres DL, Drummond AJ, Rambaut A. Bayesian phylogenetic and phylodynamic data integration using BEAST 1.10. *Virus Evol*. 2018;4:vey016. [PubMed](#) <https://doi.org/10.1093/ve/vey016>
8. Li W, Godzik A. Cd-hit: a fast program for clustering and comparing large sets of protein or nucleotide sequences. *Bioinformatics*. 2006;22:1658–9. [PubMed](#) <https://doi.org/10.1093/bioinformatics/btl158>
9. Martin DP, Varsani A, Roumagnac P, Botha G, Maslamoney S, Schwab T, et al. RDP5: a computer program for analyzing recombination in, and removing signals of recombination from, nucleotide sequence datasets. *Virus Evol*. 2021;7:veaa087. **PMID 33936774**
10. Rambaut A, Lam TT, Max Carvalho L, Pybus OG. Exploring the temporal structure of heterochronous sequences using TempEst (formerly Path-O-Gen). *Virus Evol*. 2016;2:vew007. [PubMed](#) <https://doi.org/10.1093/ve/vew007>

11. Drummond AJ, Ho SYW, Phillips MJ, Rambaut A. Relaxed phylogenetics and dating with confidence. *PLoS Biol.* 2006;4:e88. [PubMed https://doi.org/10.1371/journal.pbio.0040088](https://doi.org/10.1371/journal.pbio.0040088)
12. Ferreira MAR, Suchard MA. Bayesian analysis of elapsed times in continuous-time Markov chains. *Can J Stat Rev Can Stat.* 2008;36:355–68. <https://doi.org/10.1002/cjs.5550360302>
13. Lemey P, Rambaut A, Drummond AJ, Suchard MA. Bayesian phylogeography finds its roots. *PLOS Comput Biol.* 2009;5:e1000520. <https://doi.org/10.1371/journal.pcbi.1000520>
14. Rambaut A, Drummond AJ, Xie D, Baele G, Suchard MA. Posterior summarization in Bayesian phylogenetics using Tracer 1.7. *Syst Biol.* 2018;67:901–4. [PubMed https://doi.org/10.1093/sysbio/syy032](https://doi.org/10.1093/sysbio/syy032)

**Appendix Table 1.** Socio-demographic and laboratory characteristics of the DENV-3 cases, Brazil, 2023.

| IDs                            | Municipality | Collection | Age/Sex | Symptoms             | Ct | Genome length | GenBank accession |
|--------------------------------|--------------|------------|---------|----------------------|----|---------------|-------------------|
| Fiocruz-ILMD-LACENRR-AR2300001 | Cantá        | 2023–03–04 | 25/F    | F, M                 | 31 | 10,697        | OQ706226          |
| Fiocruz-ILMD-LACENRR-AR2300002 | Boa Vista    | 2023–01–22 | 8/M     | F, L, P, PE, T       | 28 | 10,511        | OQ706227          |
| Fiocruz-ILMD-LACENRR-AR2300003 | Boa Vista    | 2023–01–03 | 50/F    | F, BP, M, R, V       | 29 | 10,553        | OQ706228          |
| Fiocruz-ILMD-LACENPR-AR2300004 | Curitiba*    | 2023–03–12 | 32/M    | F, Fa, H, M, N, R, V | 27 | 10,673        | OQ868517          |

Symptoms: BP = back pain, F = Fever, Fa = fatigue, H = headache, L = leucopenia, M = myalgia, N = nausea, p = polyarthralgia, PE = periarticular edema, R = rash, T = thrombocytopenia, V = vomiting. \* Although the sample was collected in Curitiba, Paraná, Brazil, the patient arrived in Brazil in 2023–03–09 with dengue symptoms, thus it is considered by local authorities as an imported case from Suriname.

**Appendix Table 2.** DENV-3 genomes

| Accession | Country    | Collection date |
|-----------|------------|-----------------|
| AY099336  | Sri Lanka  | 2000            |
| AY099337  | Martinique | 1999            |
| AY662691  | Singapore  | 2004            |
| AY679147  | Brazil     | 2002            |
| AY770511  | India      | 2003            |
| DQ675533  | Taiwan     | 1999            |
| EF629366  | Brazil     | 2004-11         |
| EF629367  | Brazil     | 2004-11         |
| EF629368  | Brazil     | 2004-11         |
| EF629369  | Brazil     | 2002-01         |
| EF643017  | Brazil     | 2003            |
| EU081181  | Singapore  | 2004            |
| EU081182  | Singapore  | 2005            |
| EU081183  | Singapore  | 2005            |
| EU081184  | Singapore  | 2005            |
| EU081185  | Singapore  | 2005            |
| EU081186  | Singapore  | 2005            |
| EU081187  | Singapore  | 2005            |
| EU081188  | Singapore  | 2005            |
| EU081189  | Singapore  | 2005            |
| EU081190  | Singapore  | 2005            |
| EU081191  | Singapore  | 2005            |
| EU081192  | Singapore  | 2005            |
| EU081193  | Singapore  | 2005            |
| EU081194  | Singapore  | 2005            |
| EU081195  | Singapore  | 2005            |
| EU081196  | Singapore  | 2005            |
| EU081197  | Singapore  | 2005            |
| EU081198  | Singapore  | 2005            |
| EU081199  | Singapore  | 2005            |

| Accession | Country   | Collection date |
|-----------|-----------|-----------------|
| EU081200  | Singapore | 2005            |
| EU081201  | Singapore | 2005            |
| EU081202  | Singapore | 2005            |
| EU081203  | Singapore | 2005            |
| EU081204  | Singapore | 2005            |
| EU081205  | Singapore | 2005            |
| EU081206  | Singapore | 2005            |
| EU081207  | Singapore | 2005            |
| EU081208  | Singapore | 2005            |
| EU081209  | Singapore | 2005            |
| EU081210  | Singapore | 2005            |
| EU081211  | Singapore | 2005            |
| EU081212  | Singapore | 2005            |
| EU081213  | Singapore | 2005            |
| EU081214  | Singapore | 2005            |
| EU081215  | Singapore | 2005            |
| EU081216  | Singapore | 2005            |
| EU081217  | Singapore | 2005            |
| EU081218  | Singapore | 2005            |
| EU081219  | Singapore | 2005            |
| EU081220  | Singapore | 2005            |
| EU081222  | Singapore | 2005            |
| EU081224  | Singapore | 2005            |
| EU081225  | Singapore | 2005            |
| EU482555  | USA       | 2006            |
| EU482558  | USA       | 1998            |
| EU482559  | USA       | 1998            |
| EU482563  | USA       | 1998            |
| EU482564  | USA       | 2003            |
| EU482566  | USA       | 1998            |
| EU482595  | USA       | 2003            |
| EU482596  | USA       | 1998            |
| EU482612  | Venezuela | 2001            |
| EU482613  | Venezuela | 2001            |
| EU482614  | Venezuela | 2001            |
| EU529683  | Venezuela | 2007            |
| EU529684  | Venezuela | 2001            |
| EU529685  | Venezuela | 2001            |
| EU529686  | Venezuela | 2001            |
| EU529687  | Venezuela | 2001            |
| EU529688  | Venezuela | 2001            |
| EU529689  | Venezuela | 2001            |
| EU529690  | Venezuela | 2001            |
| EU529691  | Venezuela | 2001            |
| EU529692  | USA       | 2006            |
| EU529696  | USA       | 1999            |
| EU529697  | USA       | 2000            |
| EU529698  | USA       | 2006            |
| EU529699  | USA       | 2006            |
| EU529702  | USA       | 2003            |
| EU529703  | USA       | 1998            |
| EU529704  | USA       | 2004            |
| EU529705  | USA       | 2004            |
| EU569688  | Venezuela | 2001            |
| EU569689  | Venezuela | 2001            |
| EU569690  | Venezuela | 2001            |
| EU569691  | Venezuela | 2001            |
| EU596492  | USA       | 2007            |
| EU596493  | USA       | 2007            |
| EU596494  | USA       | 2007            |
| EU660420  | Venezuela | 2001            |
| EU687196  | USA       | 2002            |
| EU687197  | USA       | 2003            |
| EU687198  | USA       | 2003            |
| EU687218  | USA       | 1998            |

| Accession | Country   | Collection date |
|-----------|-----------|-----------------|
| EU687219  | USA       | 1999            |
| EU687221  | USA       | 2000            |
| EU687226  | USA       | 1999            |
| EU687233  | USA       | 2002            |
| EU687234  | USA       | 2002            |
| EU687239  | USA       | 2003            |
| EU726768  | USA       | 2000            |
| EU726769  | USA       | 2003            |
| EU726771  | USA       | 1998            |
| EU726772  | USA       | 1998            |
| EU726773  | USA       | 1999            |
| EU726774  | USA       | 1999            |
| EU781136  | USA       | 1999            |
| EU781137  | USA       | 1999            |
| EU854291  | Venezuela | 2004            |
| EU854292  | Venezuela | 2005            |
| EU854298  | USA       | 2002            |
| EU932687  | Venezuela | 2007            |
| EU932688  | Venezuela | 2007            |
| FJ024465  | USA       | 2004            |
| FJ024466  | USA       | 2004            |
| FJ024467  | USA       | 2004            |
| FJ024468  | USA       | 2004            |
| FJ024469  | USA       | 2004            |
| FJ024470  | USA       | 2004            |
| FJ024471  | USA       | 2004            |
| FJ177308  | Brazil    | 2001            |
| FJ182004  | USA       | 2004            |
| FJ182005  | USA       | 2004            |
| FJ182006  | USA       | 2004            |
| FJ182007  | USA       | 2005            |
| FJ182008  | USA       | 2005            |
| FJ182009  | USA       | 2005            |
| FJ182010  | USA       | 2005            |
| FJ182011  | USA       | 2005            |
| FJ182013  | USA       | 1998            |
| FJ182015  | Venezuela | 2001            |
| FJ182037  | USA       | 2005            |
| FJ182038  | USA       | 2005            |
| FJ182039  | USA       | 2005            |
| FJ182040  | USA       | 2005            |
| FJ182041  | USA       | 2005            |
| FJ205870  | USA       | 2003            |
| FJ205871  | USA       | 1999            |
| FJ373302  | USA       | 2004            |
| FJ373303  | Venezuela | 2001            |
| FJ373304  | Venezuela | 2004            |
| FJ373306  | USA       | 2002            |
| FJ390371  | USA       | 2003            |
| FJ390372  | USA       | 2003            |
| FJ390373  | USA       | 2002            |
| FJ390375  | USA       | 1999            |
| FJ390376  | USA       | 1999            |
| FJ390377  | USA       | 1999            |
| FJ410176  | USA       | 2000            |
| FJ410177  | USA       | 2000            |
| FJ410178  | USA       | 2002            |
| FJ478456  | USA       | 2002            |
| FJ547069  | USA       | 1999            |
| FJ547070  | USA       | 1998            |
| FJ547071  | USA       | 2000            |
| FJ547072  | USA       | 2000            |
| FJ547073  | USA       | 2000            |
| FJ547074  | USA       | 2000            |
| FJ547075  | USA       | 2000            |



| Accession | Country   | Collection date |
|-----------|-----------|-----------------|
| FJ547076  | USA       | 2000            |
| FJ547077  | USA       | 2000            |
| FJ547078  | USA       | 2000            |
| FJ547079  | USA       | 2001            |
| FJ547080  | USA       | 2001            |
| FJ547081  | USA       | 2001            |
| FJ547082  | USA       | 2001            |
| FJ547083  | USA       | 2002            |
| FJ547084  | USA       | 2002            |
| FJ547085  | USA       | 2006            |
| FJ562107  | USA       | 2000            |
| FJ639746  | Venezuela | 2000            |
| FJ639747  | Venezuela | 2000            |
| FJ639749  | Venezuela | 2000            |
| FJ639750  | Venezuela | 2000            |
| FJ639751  | Venezuela | 2001            |
| FJ639752  | Venezuela | 2001            |
| FJ639753  | Venezuela | 2001            |
| FJ639754  | Venezuela | 2001            |
| FJ639755  | Venezuela | 2001            |
| FJ639756  | Venezuela | 2001            |
| FJ639757  | Venezuela | 2001            |
| FJ639758  | Venezuela | 2001            |
| FJ639759  | Venezuela | 2001            |
| FJ639760  | Venezuela | 2001            |
| FJ639761  | Venezuela | 2001            |
| FJ639762  | Venezuela | 2001            |
| FJ639763  | Venezuela | 2001            |
| FJ639765  | Venezuela | 2001            |
| FJ639766  | Venezuela | 2001            |
| FJ639767  | Venezuela | 2001            |
| FJ639768  | Venezuela | 2001            |
| FJ639769  | Venezuela | 2001            |
| FJ639770  | Venezuela | 2001            |
| FJ639771  | Venezuela | 2001            |
| FJ639772  | Venezuela | 2007            |
| FJ639774  | Venezuela | 2001            |
| FJ639775  | Venezuela | 2002            |
| FJ639776  | Venezuela | 2002            |
| FJ639777  | Venezuela | 2002            |
| FJ639778  | Venezuela | 2002            |
| FJ639779  | Venezuela | 2003            |
| FJ639780  | Venezuela | 2003            |
| FJ639781  | Venezuela | 2003            |
| FJ639782  | Venezuela | 2003            |
| FJ639784  | Venezuela | 2003            |
| FJ639785  | Venezuela | 2003            |
| FJ639786  | Venezuela | 2003            |
| FJ639787  | Venezuela | 2004            |
| FJ639789  | Venezuela | 2004            |
| FJ639790  | Venezuela | 2004            |
| FJ639791  | Venezuela | 2004            |
| FJ639792  | Venezuela | 2004            |
| FJ639793  | Venezuela | 2004            |
| FJ639795  | Venezuela | 2004            |
| FJ639798  | Venezuela | 2004            |
| FJ639799  | Venezuela | 2004            |
| FJ639800  | Venezuela | 2004            |
| FJ639801  | Venezuela | 2004            |
| FJ639803  | Venezuela | 2005            |
| FJ639804  | Venezuela | 2005            |
| FJ639805  | Venezuela | 2005            |
| FJ639807  | Venezuela | 2005            |
| FJ639810  | Venezuela | 2005            |
| FJ639816  | Venezuela | 2005            |

| Accession | Country             | Collection date |
|-----------|---------------------|-----------------|
| FJ639817  | Venezuela           | 2006            |
| FJ639825  | Venezuela           | 2006            |
| FJ639826  | Venezuela           | 2008            |
| FJ639827  | Venezuela           | 2008            |
| FJ644564  | India               | 2007            |
| FJ744700  | Venezuela           | 2001            |
| FJ810416  | Venezuela           | 2001            |
| FJ850048  | Nicaragua           | 2008            |
| FJ850049  | Nicaragua           | 2008            |
| FJ850052  | Nicaragua           | 2008            |
| FJ850055  | USA                 | 2004            |
| FJ850056  | USA                 | 2004            |
| FJ850079  | Brazil              | 2003            |
| FJ850080  | Brazil              | 2003            |
| FJ850083  | Brazil              | 2004            |
| FJ850086  | Brazil              | 2005            |
| FJ850089  | Brazil              | 2006            |
| FJ850092  | Brazil              | 2007            |
| FJ850094  | Brazil              | 2008            |
| FJ850096  | Venezuela           | 2001            |
| FJ850097  | Venezuela           | 2001            |
| FJ850098  | Venezuela           | 2001            |
| FJ850109  | Venezuela           | 2007            |
| FJ850110  | Venezuela           | 2007            |
| FJ850111  | Venezuela           | 2007            |
| FJ873812  | Nicaragua           | 2008            |
| FJ873813  | Nicaragua           | 2008            |
| FJ882571  | SriLanka            | 1989            |
| FJ882572  | SriLanka            | 1989            |
| FJ882573  | SriLanka            | 1993            |
| FJ882574  | SriLanka            | 1985            |
| FJ882575  | Mozambique          | 1985            |
| FJ882576  | Nicaragua           | 1994            |
| FJ882577  | Venezuela           | 2001            |
| FJ882578  | Venezuela           | 2001            |
| FJ898440  | Mexico              | 2003            |
| FJ898441  | Mexico              | 2006            |
| FJ898442  | Mexico              | 2007            |
| FJ898443  | Colombia            | 2003            |
| FJ898444  | Colombia            | 2005            |
| FJ898445  | Colombia            | 2007            |
| FJ898446  | Brazil              | 2001            |
| FJ898447  | Brazil              | 2003            |
| FJ898457  | Ecuador             | 2000            |
| FJ898458  | Peru                | 2002            |
| FJ898459  | Trinidad and Tobago | 2002            |
| FJ898462  | Anguilla            | 2001            |
| FJ898463  | Saint Lucia         | 2001            |
| FJ898464  | Guyana              | 2002            |
| FJ898468  | Venezuela           | 2000            |
| FJ898469  | Venezuela           | 2001            |
| FJ898470  | Venezuela           | 2001            |
| FJ898471  | Venezuela           | 2002            |
| FJ898472  | Venezuela           | 2003            |
| FJ898473  | Venezuela           | 2003            |
| FJ898474  | Venezuela           | 2007            |
| FJ898475  | Nicaragua           | 2008            |
| FJ898476  | Nicaragua           | 2008            |
| FJ913015  | Brazil              | 2001            |
| GQ199860  | Nicaragua           | 2008            |
| GQ199861  | Nicaragua           | 2008            |
| GQ199862  | Nicaragua           | 2008            |
| GQ199863  | Nicaragua           | 2008            |
| GQ199864  | Nicaragua           | 2008            |
| GQ199865  | Nicaragua           | 2009            |

| Accession | Country             | Collection date |
|-----------|---------------------|-----------------|
| GQ199870  | Nicaragua           | 2008            |
| GQ199871  | Nicaragua           | 2008            |
| GQ199886  | Nicaragua           | 1998            |
| GQ199887  | Sri Lanka           | 1983            |
| GQ199888  | Sri Lanka           | 1983            |
| GQ199889  | Sri Lanka           | 1983            |
| GQ199891  | Colombia            | 2001            |
| GQ252674  | Sri Lanka           | 1997            |
| GQ252678  | Venezuela           | 2001            |
| GQ466079  | India               | 2008            |
| GQ868546  | Brazil              | 2006            |
| GQ868547  | Brazil              | 2006            |
| GQ868548  | Brazil              | 2006            |
| GQ868571  | Colombia            | 2002            |
| GQ868572  | Colombia            | 2003            |
| GQ868573  | Colombia            | 2003            |
| GQ868574  | Colombia            | 2003            |
| GQ868575  | Colombia            | 2004            |
| GQ868576  | Colombia            | 2005            |
| GQ868577  | Colombia            | 2005            |
| GQ868578  | Colombia            | 2007            |
| GQ868586  | Venezuela           | 2007            |
| GQ868587  | Venezuela           | 2007            |
| GQ868616  | Saint Lucia         | 2001            |
| GQ868617  | Trinidad and Tobago | 2002            |
| GU131844  | Brazil              | 2006            |
| GU131845  | Brazil              | 2006            |
| GU131846  | Brazil              | 2006            |
| GU131847  | Brazil              | 2006            |
| GU131848  | Brazil              | 2006            |
| GU131849  | Brazil              | 2006            |
| GU131850  | Brazil              | 2006            |
| GU131851  | Brazil              | 2006            |
| GU131852  | Brazil              | 2006            |
| GU131853  | Brazil              | 2006            |
| GU131854  | Brazil              | 2006            |
| GU131855  | Brazil              | 2006            |
| GU131856  | Brazil              | 2006            |
| GU131857  | Brazil              | 2006            |
| GU131858  | Brazil              | 2006            |
| GU131859  | Brazil              | 2006            |
| GU131860  | Brazil              | 2006            |
| GU131861  | Brazil              | 2007            |
| GU131862  | Brazil              | 2007            |
| GU131865  | Brazil              | 2006            |
| GU131866  | Brazil              | 2007            |
| GU131867  | Brazil              | 2007            |
| GU131868  | Brazil              | 2007            |
| GU131869  | Brazil              | 2007            |
| GU131870  | Brazil              | 2007            |
| GU131871  | Brazil              | 2007            |
| GU131872  | Brazil              | 2007            |
| GU131873  | Brazil              | 2007            |
| GU131874  | Brazil              | 2007            |
| GU131875  | Brazil              | 2007            |
| GU131876  | Brazil              | 2007            |
| GU131877  | Brazil              | 2007            |
| GU131878  | Brazil              | 2007            |
| GU131950  | Colombia            | 2001            |
| GU131951  | Colombia            | 2003            |
| GU131952  | Colombia            | 2003            |
| GU131953  | Colombia            | 2004            |
| GU131954  | Colombia            | 2006            |
| GU363549  | China               | 2009-08-06      |
| GU370053  | Singapore           | 2007-05         |

| Accession | Country   | Collection date |
|-----------|-----------|-----------------|
| HM181972  | Nicaragua | 2009            |
| HM181973  | Nicaragua | 2009            |
| HM181974  | Nicaragua | 2009            |
| HM181975  | Nicaragua | 2009            |
| HM181976  | Nicaragua | 2009            |
| HM181977  | Nicaragua | 2009            |
| HM181978  | Nicaragua | 2009            |
| HM631856  | Nicaragua | 2009            |
| HM631857  | Nicaragua | 2009            |
| HM631858  | Nicaragua | 2009            |
| HM631859  | Nicaragua | 2009            |
| HM631860  | Nicaragua | 2009            |
| HM631861  | Nicaragua | 2009            |
| HM631862  | Nicaragua | 2009            |
| HM631863  | Nicaragua | 2009            |
| HM631864  | Nicaragua | 2009            |
| HM631869  | Nicaragua | 2009            |
| HM756274  | Nicaragua | 2009            |
| HM756275  | Nicaragua | 2009            |
| HM756276  | Nicaragua | 2009            |
| HM756277  | Nicaragua | 2009            |
| HM756278  | Nicaragua | 2009            |
| HM756279  | Nicaragua | 2009            |
| HM756280  | Nicaragua | 2009            |
| HM756281  | Nicaragua | 2009            |
| HM756282  | Nicaragua | 2009            |
| HQ166030  | Nicaragua | 2009            |
| HQ166031  | Nicaragua | 2009            |
| HQ166032  | Nicaragua | 2009            |
| HQ166033  | Nicaragua | 2009            |
| HQ166034  | Nicaragua | 2009            |
| HQ235027  | Paraguay  | 2007            |
| HQ332170  | Venezuela | 2006            |
| HQ332171  | Venezuela | 2006            |
| HQ541785  | Nicaragua | 2009            |
| HQ541789  | Nicaragua | 2008            |
| HQ541790  | Nicaragua | 2008            |
| HQ541791  | Nicaragua | 2008            |
| HQ541795  | Nicaragua | 2009            |
| HQ541796  | Nicaragua | 2009            |
| HQ541797  | Nicaragua | 2009            |
| HQ541802  | Nicaragua | 2009            |
| HQ541804  | Nicaragua | 2009            |
| HQ541806  | Nicaragua | 2009            |
| HQ671176  | Nicaragua | 2009            |
| HQ671177  | Nicaragua | 2009            |
| HQ671178  | Nicaragua | 2009            |
| HQ705609  | Nicaragua | 2009            |
| HQ705610  | Nicaragua | 2009            |
| HQ705611  | Nicaragua | 2009            |
| HQ705612  | Nicaragua | 2009            |
| HQ705613  | Nicaragua | 2009            |
| HQ705614  | Nicaragua | 2009            |
| HQ705615  | Nicaragua | 2009            |
| HQ705616  | Nicaragua | 2009            |
| HQ705617  | Nicaragua | 2009            |
| HQ705618  | Nicaragua | 2009            |
| HQ705619  | Nicaragua | 2009            |
| HQ705620  | Nicaragua | 2009            |
| HQ705621  | Nicaragua | 2009            |
| HQ705622  | Nicaragua | 2009            |
| HQ705623  | Nicaragua | 2009            |
| HQ891025  | Nicaragua | 2009            |
| JF504679  | China     | 2009-09         |
| JF808118  | Brazil    | 2002            |

| Accession | Country   | Collection date |
|-----------|-----------|-----------------|
| JF808119  | Brazil    | 2004            |
| JF808120  | Brazil    | 2009            |
| JF808121  | Brazil    | 2007            |
| JF808122  | Paraguay  | 2003            |
| JF808123  | Paraguay  | 2002            |
| JF808124  | Brazil    | 2003            |
| JF808125  | Brazil    | 2002            |
| JF808126  | Brazil    | 2003            |
| JF808127  | Brazil    | 2002            |
| JF808128  | Paraguay  | 2003            |
| JF808129  | Paraguay  | 2003            |
| JF920393  | Nicaragua | 2009            |
| JF920394  | Nicaragua | 2009            |
| JF920395  | Nicaragua | 2009            |
| JF920396  | Nicaragua | 2009            |
| JF920397  | Nicaragua | 2010            |
| JF920398  | Nicaragua | 2009            |
| JF920399  | Nicaragua | 2009            |
| JF920400  | Nicaragua | 2009            |
| JF920401  | Nicaragua | 2010            |
| JF920402  | Nicaragua | 2009            |
| JF920403  | Nicaragua | 2009            |
| JF920404  | Nicaragua | 2009            |
| JF920405  | Nicaragua | 2010            |
| JF920406  | Nicaragua | 2010            |
| JF920407  | Nicaragua | 2009            |
| JF920408  | Nicaragua | 2010            |
| JF920409  | Nicaragua | 2010            |
| JF937620  | Nicaragua | 2010            |
| JF937621  | Nicaragua | 2010            |
| JF937622  | Nicaragua | 2010            |
| JF937623  | Nicaragua | 2010            |
| JF937624  | Nicaragua | 2010            |
| JF937625  | Nicaragua | 2010            |
| JF937626  | Nicaragua | 2010            |
| JF937627  | Nicaragua | 2010            |
| JF937628  | Nicaragua | 2010            |
| JF937629  | Nicaragua | 2010            |
| JF937630  | Nicaragua | 2009            |
| JF937631  | Nicaragua | 2009            |
| JF937632  | Nicaragua | 2009            |
| JF937633  | Nicaragua | 2010            |
| JF937634  | Nicaragua | 2010            |
| JF937636  | Nicaragua | 2009            |
| JF937637  | Nicaragua | 2010            |
| JF937638  | Nicaragua | 2010            |
| JF937639  | Nicaragua | 2010            |
| JF937640  | Nicaragua | 2010            |
| JF937641  | Nicaragua | 2009            |
| JF937642  | Nicaragua | 2009            |
| JF937643  | Nicaragua | 2009            |
| JF937646  | Nicaragua | 2010            |
| JF937647  | Nicaragua | 2009            |
| JF937648  | Nicaragua | 2010            |
| JF937652  | Nicaragua | 2009            |
| JN000936  | Nicaragua | 2009            |
| JN000937  | Nicaragua | 2010            |
| JN000938  | Nicaragua | 2010            |
| JN093513  | Nicaragua | 2010            |
| JN093514  | Nicaragua | 2009            |
| JN093515  | Nicaragua | 2010            |
| JN093517  | Nicaragua | 2009            |
| JN183884  | Nicaragua | 2009            |
| JN662391  | China     | 2009-08-06      |
| JQ411814  | Sri Lanka | 1989            |

| Accession | Country     | Collection date |
|-----------|-------------|-----------------|
| JQ922555  | India       | 1966            |
| JQ922556  | India       | 2005            |
| JQ922557  | India       | 2005            |
| JX669489  | Brazil      | 2003            |
| JX669490  | Brazil      | 2002            |
| JX669491  | Brazil      | 2002            |
| JX669492  | Brazil      | 2005            |
| JX669493  | Brazil      | 2005            |
| JX669494  | Brazil      | 2005            |
| JX669495  | Brazil      | 2004            |
| JX669496  | Brazil      | 2006            |
| JX669497  | Brazil      | 2005            |
| JX669498  | Brazil      | 2004            |
| JX669499  | Brazil      | 2004            |
| JX669500  | Brazil      | 2005            |
| JX669501  | Brazil      | 2005            |
| JX669502  | Brazil      | 2005            |
| JX669503  | Brazil      | 2005            |
| JX669504  | Brazil      | 2006            |
| JX669505  | Brazil      | 2006            |
| JX669506  | Brazil      | 2006            |
| JX669507  | Brazil      | 2006            |
| JX669508  | Brazil      | 2006            |
| KC425219  | Brazil      | 2002            |
| KF041254  | Pakistan    | 2008            |
| KF041255  | Pakistan    | 2007            |
| KF041256  | Pakistan    | 2006            |
| KF041257  | Pakistan    | 2006            |
| KF041258  | Pakistan    | 2009            |
| KF041259  | Pakistan    | 2006            |
| KF921913  | Nicaragua   | 2009            |
| KF921914  | Nicaragua   | 2009            |
| KF921916  | Nicaragua   | 2009            |
| KF921920  | Nicaragua   | 2009            |
| KF921921  | Nicaragua   | 2009            |
| KF921922  | Nicaragua   | 2009            |
| KF921923  | Nicaragua   | 2009            |
| KF921924  | Nicaragua   | 2010            |
| KF921926  | Nicaragua   | 2010            |
| KF921928  | Nicaragua   | 2010            |
| KF921929  | Nicaragua   | 2010            |
| KF954945  | China       | 2013-08-08      |
| KF954946  | China       | 2013-08-08      |
| KF954947  | China       | 2013-08-08      |
| KF954948  | China       | 2013-08-08      |
| KF954949  | China       | 2013-08-08      |
| KF955449  | Venezuela   | 2001-10-13      |
| KF955451  | Venezuela   | 2003-12-01      |
| KF955453  | Venezuela   | 2003-12-19      |
| KF955454  | Venezuela   | 2004-11-07      |
| KF955456  | Puerto Rico | 2006            |
| KF955465  | Puerto Rico | 2000            |
| KF955466  | Puerto Rico | 2000            |
| KF955468  | Puerto Rico | 2001            |
| KF955471  | Venezuela   | 2004            |
| KF955472  | Venezuela   | 2004            |
| KF955473  | Brazil      | 2002            |
| KF955474  | Sri Lanka   | 1989            |
| KF955479  | Venezuela   | 2001            |
| KF955481  | Venezuela   | 2007            |
| KF955486  | Venezuela   | 2001            |
| KF955487  | Venezuela   | 2001            |
| KF955490  | Nicaragua   | 2008            |
| KF955505  | Grenada     | 2002            |
| KF971695  | Nicaragua   | 2009            |

| Accession | Country      | Collection date |
|-----------|--------------|-----------------|
| KF971709  | Nicaragua    | 2009            |
| KF973476  | Nicaragua    | 2011            |
| KF973477  | Nicaragua    | 2011            |
| KF973478  | Nicaragua    | 2012            |
| KF973479  | Nicaragua    | 2012            |
| KF973480  | Nicaragua    | 2012            |
| KF973481  | Nicaragua    | 2011            |
| KF973482  | Nicaragua    | 2011            |
| KF973483  | Nicaragua    | 2011            |
| KF973484  | Nicaragua    | 2011            |
| KF973485  | Nicaragua    | 2011            |
| KF973486  | Nicaragua    | 2012            |
| KF973487  | Nicaragua    | 2011            |
| KJ189255  | Peru         | 2002            |
| KJ189256  | Peru         | 2002            |
| KJ189257  | Peru         | 2004            |
| KJ189258  | Peru         | 2002            |
| KJ189259  | Peru         | 2002            |
| KJ189260  | Peru         | 2002            |
| KJ189261  | Peru         | 2008            |
| KJ189262  | Peru         | 2004            |
| KJ189263  | Peru         | 2004            |
| KJ189264  | Peru         | 2004            |
| KJ189265  | Peru         | 2004            |
| KJ189266  | Peru         | 2004            |
| KJ189267  | Peru         | 2007            |
| KJ189268  | Peru         | 2007            |
| KJ189269  | Peru         | 2007            |
| KJ189270  | Peru         | 2007            |
| KJ189271  | Peru         | 2007            |
| KJ189272  | Peru         | 2007            |
| KJ189273  | Peru         | 2007            |
| KJ189274  | Peru         | 2007            |
| KJ189275  | Peru         | 2007            |
| KJ189276  | Peru         | 2007            |
| KJ189277  | Peru         | 2007            |
| KJ189278  | Peru         | 2007            |
| KJ189279  | Peru         | 2007            |
| KJ189280  | Peru         | 2007            |
| KJ189281  | Peru         | 2007            |
| KJ189282  | Peru         | 2007            |
| KJ189283  | Peru         | 2007            |
| KJ189284  | Peru         | 2008            |
| KJ189285  | Peru         | 2008            |
| KJ189286  | Peru         | 2008            |
| KJ189287  | Peru         | 2008            |
| KJ189288  | Peru         | 2008            |
| KJ189289  | Peru         | 2008            |
| KJ189290  | Peru         | 2008            |
| KJ189291  | Peru         | 2008            |
| KJ189292  | Peru         | 2009            |
| KJ189293  | Peru         | 2005            |
| KJ189294  | Peru         | 2006            |
| KJ189295  | Peru         | 2006            |
| KJ189296  | Peru         | 2006            |
| KJ189297  | Peru         | 2006            |
| KJ189298  | Peru         | 2008            |
| KJ189299  | Peru         | 2005            |
| KJ189300  | Peru         | 2008            |
| KJ189301  | Peru         | 2008            |
| KJ643590  | Peru         | 2007            |
| KJ830751  | Saudi Arabia | 2014-01-26      |
| KT726340  | Cuba         | 2001            |
| KT726341  | Cuba         | 2001            |
| KT726342  | Cuba         | 2001            |

| Accession | Country   | Collection date |
|-----------|-----------|-----------------|
| KT726343  | Cuba      | 2001            |
| KT726344  | Cuba      | 2001            |
| KT726345  | Cuba      | 2002            |
| KT726346  | Cuba      | 2002            |
| KT726347  | Cuba      | 2002            |
| KT726348  | Cuba      | 2002            |
| KT726349  | Cuba      | 2001            |
| KT726350  | Cuba      | 2001            |
| KT726351  | Cuba      | 2001            |
| KT726352  | Cuba      | 2001            |
| KT726353  | Cuba      | 2001            |
| KT726354  | Cuba      | 2001            |
| KT726355  | Cuba      | 2001            |
| KT726356  | Cuba      | 2001            |
| KT726357  | Cuba      | 2001            |
| KT726358  | Cuba      | 2001            |
| KT726359  | Cuba      | 2001            |
| KT726360  | Cuba      | 2001            |
| KT726361  | Cuba      | 2002            |
| KU216208  | India     | 2013-11-11      |
| KU216209  | India     | 2013-11-11      |
| KU509278  | Barbados  | 2007            |
| KU509281  | India     | 2009            |
| KU509282  | Senegal   | 2009            |
| KU509283  | Sri Lanka | 2006            |
| KU509286  | India     | 2011            |
| KX380841  | Singapore | 2012            |
| KX380842  | Singapore | 2013            |
| KX855927  | India     | 2014-10-15      |
| KY921907  | Singapore | 2015-04         |
| LC379193  | Gabon     | 2016-05-15      |
| LC379194  | Gabon     | 2016-05-20      |
| LC379195  | Gabon     | 2016-07-14      |
| LC379196  | Gabon     | 2016-07-22      |
| LC379197  | Gabon     | 2017-04-15      |
| LC410192  | Thailand  | 2016-10         |
| LC410193  | Thailand  | 2016-12         |
| LC410194  | Thailand  | 2016-12         |
| LC410195  | Thailand  | 2017-01         |
| LT898451  | Malaysia  | 2011            |
| LT898452  | Malaysia  | 2011            |
| LT996904  | Malaysia  | 2007            |
| LT996905  | Malaysia  | 2008            |
| LT996906  | Malaysia  | 2008            |
| LT996907  | Malaysia  | 2010            |
| LT996908  | Malaysia  | 2010            |
| LT996909  | Malaysia  | 2010            |
| LT996910  | Malaysia  | 2010            |
| LT996911  | Malaysia  | 2010            |
| LT996912  | Malaysia  | 1987            |
| MF142763  | Thailand  | 2015-09         |
| MF370226  | China     | 2013-08-20      |
| MG721059  | India     | 2016            |
| MG721061  | India     | 2016            |
| MG721064  | India     | 2016            |
| MH048677  | Malaysia  | 2014-12         |
| MH051731  | Malaysia  | 2014-12         |
| MH051733  | Malaysia  | 2014-12         |
| MH544647  | Colombia  | 2015-08-23      |
| MH544649  | Colombia  | 2015-09-15      |
| MH544650  | Colombia  | 2015-09-07      |
| MH544651  | Colombia  | 2016-04-16      |
| MH822957  | India     | 2013            |
| MH888333  | Bolivia   | 2011-01-01      |
| MH891766  | India     | 2017-02-21      |



| Accession | Country      | Collection date |
|-----------|--------------|-----------------|
| MK858149  | India        | 2016-08-26      |
| MK858150  | India        | 2016-08-10      |
| MK858151  | India        | 2016-11-08      |
| MK858152  | India        | 2016-08-24      |
| MK858153  | India        | 2016-10-14      |
| MK858154  | India        | 2017-10-12      |
| MK858155  | India        | 2017-10-09      |
| MK894339  | China        | 2018-04-09      |
| MK894340  | China        | 2018-10-16      |
| MK894341  | China        | 2018-12-30      |
| MN018367  | China        | 2015-09-13      |
| MN018368  | China        | 2013-07-25      |
| MN018371  | China        | 2015-08-08      |
| MN018372  | China        | 2016-03-18      |
| MN018375  | China        | 2015-10-23      |
| MN018376  | China        | 2015-07-06      |
| MN018378  | China        | 2015-09-30      |
| MN018381  | China        | 2016-05-06      |
| MN018385  | China        | 2016-09-20      |
| MN018386  | China        | 2013-07-28      |
| MN227697  | China        | 2019-05-19      |
| MN227698  | China        | 2019-07-02      |
| MN227699  | China        | 2019-06-30      |
| MN227700  | China        | 2019-07-08      |
| MN227701  | China        | 2019-07-08      |
| MN227702  | China        | 2019-06-01      |
| MN227703  | China        | 2019-07-18      |
| MN253124  | India        | 2017-08-10      |
| MN253125  | India        | 2017-10-27      |
| MN253126  | India        | 2016            |
| MN253127  | India        | 2018-09-06      |
| MN253128  | India        | 2018-09-18      |
| MN253129  | India        | 2018-09-20      |
| MN253130  | India        | 2018-12-09      |
| MN253131  | India        | 2018-12-09      |
| MN253132  | India        | 2018-09-18      |
| MN253133  | India        | 2018-10-13      |
| MN448966  | Thailand     | 2012-09-25      |
| MN448967  | Thailand     | 2012-09-25      |
| MN448986  | Thailand     | 2011-06-14      |
| MN448991  | Thailand     | 2012-05-11      |
| MN448992  | Thailand     | 2012-10-01      |
| MN453624  | Singapore    | 2016-01-20      |
| MN922036  | China        | 2019-07-17      |
| MN964273  | China        | 2019-11-09      |
| MN964274  | China        | 2019-11-21      |
| MT261972  | Burkina Faso | 2017-10-16      |
| MT261973  | Burkina Faso | 2017-11-09      |
| MT261974  | Burkina Faso | 2017-11-13      |
| MT261975  | Burkina Faso | 2017-11-17      |
| MT261976  | Burkina Faso | 2017-10-04      |
| MT261977  | Burkina Faso | 2017-10-12      |
| MT261978  | Burkina Faso | 2017-10-27      |
| MT261979  | Burkina Faso | 2017-11-02      |
| MW192820  | India        | 2016-08         |
| MW192821  | India        | 2016-08         |
| MW192822  | India        | 2016-08         |
| MW192823  | India        | 2016-07         |
| MW192824  | India        | 2017-08         |
| MW288025  | Senegal      | 2018-10         |
| MW288026  | Senegal      | 2018-10         |
| MW288027  | Senegal      | 2018-10         |
| MW288028  | Senegal      | 2018-10         |
| MW288031  | Senegal      | 2018-11         |
| MW288033  | Senegal      | 2018-11         |

| Accession | Country     | Collection date |
|-----------|-------------|-----------------|
| MW288035  | Senegal     | 2018-11         |
| MW288037  | Senegal     | 2018-11         |
| MW288038  | Senegal     | 2018-11         |
| MW288039  | Senegal     | 2018-11         |
| MW288040  | Senegal     | 2018-11         |
| MW720883  | China       | 2019-09         |
| MW720884  | China       | 2019-09         |
| MW720885  | China       | 2019-09         |
| MW720886  | China       | 2019-09         |
| MW720887  | China       | 2019-09         |
| MW720888  | China       | 2019-09         |
| MW788883  | Myanmar     | 2017-06         |
| MW788884  | Myanmar     | 2017-07         |
| MW788886  | Myanmar     | 2017-07         |
| MW788887  | Myanmar     | 2017-07         |
| MW788888  | Myanmar     | 2017-07         |
| MW788889  | Myanmar     | 2018-07         |
| MW788891  | Myanmar     | 2019-12         |
| MW788893  | Myanmar     | 2019-07         |
| MW788896  | Myanmar     | 2019-05         |
| MW788904  | Myanmar     | 2018-07         |
| MW788906  | Myanmar     | 2018-06         |
| MW788907  | Myanmar     | 2018-10         |
| MW788910  | Myanmar     | 2018-08         |
| MW788911  | Myanmar     | 2018-07         |
| MW945428  | Puerto Rico | 2006            |
| MW946612  | Thailand    | 2010            |
| MW946615  | Thailand    | 2014            |
| MW946633  | Thailand    | 2013            |
| MW946659  | Thailand    | 2013            |
| MW946662  | Thailand    | 2013            |
| MW946679  | Thailand    | 2014            |
| MW946690  | Thailand    | 2014            |
| MW946693  | Thailand    | 2012            |
| MW946694  | Thailand    | 2014            |
| MW946704  | Thailand    | 2013            |
| MW946711  | Thailand    | 2012            |
| MW946721  | Thailand    | 2011            |
| MW946741  | Thailand    | 2014            |
| MW946763  | Thailand    | 2013            |
| MW946767  | Thailand    | 2006            |
| MW946775  | Thailand    | 2014            |
| MW946778  | Thailand    | 2013            |
| MW946783  | Thailand    | 2012            |
| MW946798  | Thailand    | 2013            |
| MW946799  | Thailand    | 2012            |
| MW946800  | Thailand    | 2012            |
| MW946801  | Thailand    | 2014            |
| MW946802  | Thailand    | 2014            |
| MW946808  | Thailand    | 2010            |
| MW946810  | Thailand    | 2012            |
| MW946815  | Thailand    | 2006            |
| MW946839  | Thailand    | 2011            |
| MW946841  | Thailand    | 2012            |
| MW946843  | Thailand    | 2014            |
| MW946870  | Thailand    | 2014            |
| MW946872  | Thailand    | 2014            |
| MW946881  | Thailand    | 2014            |
| MW946891  | Thailand    | 2011            |
| MW946918  | Nicaragua   | 2009            |
| MW946957  | Thailand    | 2013            |
| MW946958  | Thailand    | 2002            |
| MW946973  | Thailand    | 2013            |
| MW946974  | Thailand    | 2011            |
| MW946979  | Thailand    | 2014            |

| Accession | Country      | Collection date |
|-----------|--------------|-----------------|
| MZ008468  | Nicaragua    | 2014            |
| MZ008469  | Nicaragua    | 2013            |
| MZ008470  | Nicaragua    | 2013            |
| MZ008471  | Nicaragua    | 2013            |
| MZ008472  | Nicaragua    | 2013            |
| MZ008473  | Nicaragua    | 2013            |
| MZ008474  | Nicaragua    | 2013            |
| MZ008475  | Nicaragua    | 2013            |
| MZ008476  | Nicaragua    | 2014            |
| MZ008477  | Nicaragua    | 2013            |
| MZ008478  | Nicaragua    | 2013            |
| MZ312921  | India        | 2018-07-09      |
| MZ544585  | Kenya        | 2019-03         |
| MZ544586  | Kenya        | 2019-03         |
| MZ544587  | Kenya        | 2019-03         |
| MZ544588  | Kenya        | 2019-03         |
| MZ857204  | Kenya        | 2011            |
| MZ857217  | Saudi Arabia | 2016            |
| OK605762  | Paraguay     | 2007            |
| OK605765  | Ecuador      | 2001            |
| OK605766  | Somalia      | 1993            |
| OM368353  | China        | 2019-05-17      |
| OM417340  | Mexico       | 2021-09-21      |
| OM417341  | Mexico       | 2021-09-19      |
| OM638675  | India        | 2021-11-29      |
| OM865777  | Bhutan       | 2019-07-29      |
| OM865778  | Bhutan       | 2019-07-29      |
| OM865779  | Bhutan       | 2019-07-29      |
| OM865780  | Bhutan       | 2019-07-30      |
| OM865781  | Bhutan       | 2019-07-31      |
| OM865782  | Bhutan       | 2019-08-03      |
| OM865783  | Bhutan       | 2019-08-02      |
| OM865784  | Bhutan       | 2019-08-08      |
| OM865785  | Bhutan       | 2019-08-08      |
| OM865786  | Bhutan       | 2019-08-03      |
| OM865787  | Bhutan       | 2019-08-06      |
| OM865788  | Bhutan       | 2019-08-09      |
| OM865789  | Bhutan       | 2019-08-07      |
| OM865790  | Bhutan       | 2019-08-09      |
| OM865791  | Bhutan       | 2019-08-10      |
| OM865792  | Bhutan       | 2019-08         |
| OM865793  | Bhutan       | 2019-07-19      |
| OM865794  | Bhutan       | 2019-07-27      |
| OM865795  | Bhutan       | 2019-08-24      |
| OM865796  | Bhutan       | 2019-08-20      |
| OM865797  | Bhutan       | 2019-08-20      |
| OM865798  | Bhutan       | 2019-08-22      |
| OM865799  | Bhutan       | 2019-08-19      |
| OM865800  | Bhutan       | 2019-08-19      |
| OM865801  | Bhutan       | 2019-08-19      |
| OM865802  | Bhutan       | 2019-07-17      |
| OM865803  | Bhutan       | 2019-07-17      |
| OM865804  | Bhutan       | 2019-07-28      |
| OM865805  | Bhutan       | 2019-07-18      |
| OM865806  | Bhutan       | 2019-08-26      |
| OM865807  | Bhutan       | 2019-08-24      |
| OM865808  | Bhutan       | 2019-08-28      |
| OM865809  | Bhutan       | 2019-09-04      |
| OM865810  | Bhutan       | 2019-09-02      |
| OM865811  | Bhutan       | 2019-08-31      |
| OM865812  | Bhutan       | 2019-09-07      |
| OM865813  | Bhutan       | 2019-09-09      |
| OM865814  | Bhutan       | 2019-09-09      |
| OM865815  | Bhutan       | 2019-09-10      |
| OM865816  | Bhutan       | 2019-09-14      |

| Accession | Country   | Collection date |
|-----------|-----------|-----------------|
| OM865817  | Bhutan    | 2019-09-21      |
| OM865818  | Bhutan    | 2019-08         |
| OM865819  | Bhutan    | 2019-08         |
| OM865820  | Bhutan    | 2019-08         |
| ON007080  | Thailand  | 2011-08-04      |
| ON055565  | Thailand  | 2010-02-16      |
| ON055567  | Thailand  | 2011-08-25      |
| ON109599  | India     | 2021            |
| ON123655  | India     | 2020            |
| ON123658  | India     | 2019            |
| ON123659  | India     | 2018            |
| ON123660  | India     | 2018            |
| ON123662  | India     | 2018            |
| ON123665  | India     | 2018            |
| ON123669  | India     | 2018            |
| ON123670  | India     | 2018            |
| ON799401  | India     | 2018            |
| ON890788  | Ethiopia  | 2019-11-09      |
| ON890789  | Maldives  | 2019-05-19      |
| ON890819  | China     | 2019-07-08      |
| ON891145  | China     | 2019-06-01      |
| ON900159  | China     | 2019-06-01      |
| ON907582  | China     | 2019-07-08      |
| ON908232  | Ethiopia  | 2019-11-09      |
| ON908233  | Maldives  | 2019-05-19      |
| ON908234  | China     | 2019-07-08      |
| ON908245  | China     | 2019-06-01      |
| OP410993  | Singapore | 2008-09         |
| OP410994  | Singapore | 2013-01         |
| OP410997  | Singapore | 2019-01         |
| OP410998  | Singapore | 2018-02         |
| OP895705  | India     | 2018            |
| OP895928  | Maldives  | 2019-03         |
| OP895929  | Maldives  | 2019-12         |
| OP921002  | India     | 2022-07-27      |
| OQ339138  | India     | 2022            |
| OQ445895  | Cuba      | 2022-08-01      |
| OQ445896  | Cuba      | 2022-07-25      |
| OQ445897  | Cuba      | 2022-07-25      |
| OQ445898  | Cuba      | 2022-07-30      |
| OQ445899  | Cuba      | 2022-07-28      |
| OQ445901  | Cuba      | 2022-07-25      |
| OQ445902  | Cuba      | 2022-07-26      |
| OQ445903  | Cuba      | 2022-07-19      |
| OQ445904  | Cuba      | 2022-07-30      |
| OQ445905  | Cuba      | 2022-08-02      |
| OQ445906  | Cuba      | 2022-08-03      |
| OQ445907  | Cuba      | 2022-08-03      |
| OQ445908  | Cuba      | 2022-07-27      |
| OQ445909  | Cuba      | 2022-08-08      |
| OQ445910  | Cuba      | 2022-08-08      |
| OQ445911  | Cuba      | 2022-08-06      |
| OQ445912  | Cuba      | 2022-08-09      |
| OQ445913  | Cuba      | 2022-08-09      |
| OQ445914  | Cuba      | 2022-08-04      |
| OQ445915  | Cuba      | 2022-08-10      |
| OQ445916  | Cuba      | 2022-08-10      |
| OQ445917  | Cuba      | 2022-08-08      |
| OQ445918  | USA       | 2022-08-09      |
| OQ445919  | USA       | 2022-08-15      |
| OQ445920  | USA       | 2022-08-18      |
| OQ445921  | USA       | 2022-08-28      |
| OQ445922  | USA       | 2022-08-29      |
| OQ445923  | USA       | 2022-09-05      |
| OQ445924  | Cuba      | 2022-09-02      |

| Accession | Country     | Collection date |
|-----------|-------------|-----------------|
| OQ445925  | USA         | 2022-09-14      |
| OQ445926  | Cuba        | 2022-09-11      |
| OQ445927  | USA         | 2022-09-25      |
| OQ445928  | Cuba        | 2022-09-20      |
| OQ445929  | USA         | 2022-09-25      |
| OQ445930  | USA         | 2022-10-10      |
| OQ445931  | USA         | 2022-10-19      |
| OQ445932  | USA         | 2022-10-23      |
| OQ445933  | USA         | 2022-10-24      |
| OQ445934  | USA         | 2022-10-20      |
| OQ445935  | USA         | 2022-10-26      |
| OQ445936  | Cuba        | 2022-07-26      |
| OQ445937  | Cuba        | 2022-07-22      |
| OQ445938  | Cuba        | 2022-07-21      |
| OQ445939  | Cuba        | 2022-07-22      |
| OQ445940  | Cuba        | 2022-07-09      |
| OQ445941  | Cuba        | 2022-07-21      |
| OQ445942  | Cuba        | 2022-07-22      |
| OQ445943  | Cuba        | 2022-07-19      |
| OQ445944  | Cuba        | 2022-07-22      |
| OQ445945  | Cuba        | 2022-07-17      |
| OQ445946  | USA         | 2022-08-09      |
| OQ445947  | USA         | 2022-08-05      |
| OQ445948  | USA         | 2022-07-29      |
| OQ445949  | Cuba        | 2022-07-15      |
| OQ445950  | Cuba        | 2022-07-09      |
| OQ445951  | Cuba        | 2022-07-09      |
| OQ445952  | Cuba        | 2022-07-10      |
| OQ445953  | USA         | 2022-07-13      |
| OQ445954  | Cuba        | 2022-07-08      |
| OQ445955  | Cuba        | 2022-07-09      |
| OQ445956  | Cuba        | 2022-07-06      |
| OQ445957  | Cuba        | 2022-06-25      |
| OQ445958  | Cuba        | 2022-06-28      |
| OQ445959  | Cuba        | 2022-06-29      |
| OQ445960  | Cuba        | 2022-06-21      |
| OQ445961  | Cuba        | 2022-05-22      |
| OQ445962  | Cuba        | 2022-06-28      |
| OQ836205  | Puerto Rico | 2022-10-29      |
| OQ836206  | Puerto Rico | 2022-08-20      |
| OQ836207  | Puerto Rico | 2022-09-02      |
| OQ836208  | Puerto Rico | 2022-12-27      |
| OQ836209  | Puerto Rico | 2023-01-24      |
| OQ836210  | Puerto Rico | 2022-07-30      |
| OQ836211  | Puerto Rico | 2022-07-27      |
| OQ727062  | Brazil      | 2006-04-17      |

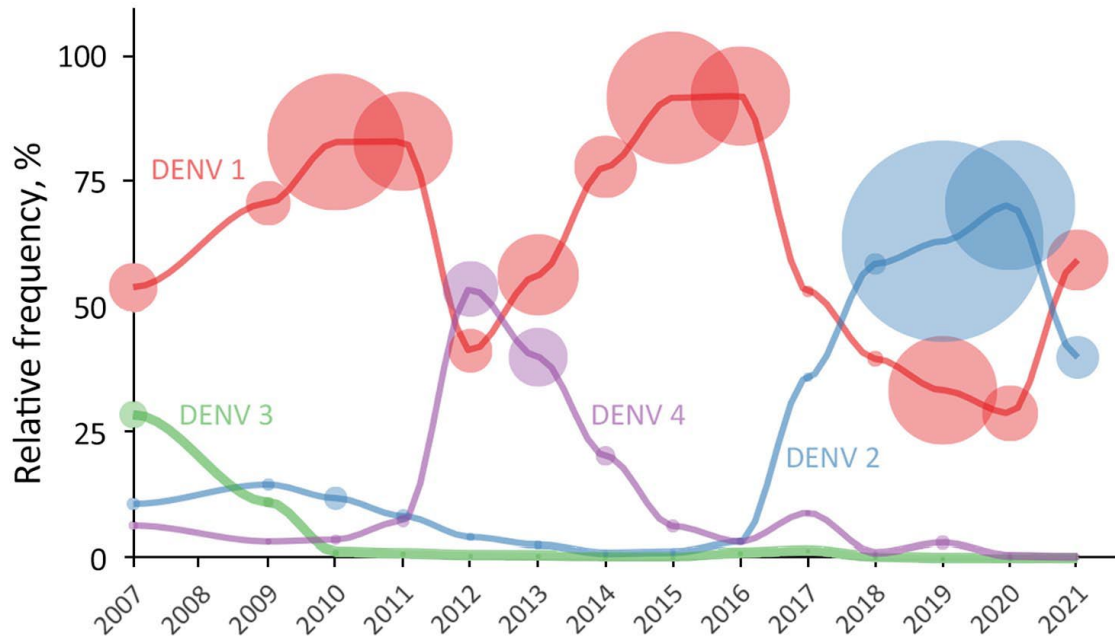

**Appendix Figure.** Relative frequencies of the four DENV serotypes in Brazil since 2007. The size of the circles is relative to the number of DENV cases attributable to each serotype in each year.
